# Supplementary material for: High-Powered Performance Pay and Crowding Out of Nonmonetary Motives
Source: Atypon-hosted journal article supplement (doi:10.1287/mnsc.2017.2846), 2017-10-23
Supplement: mnsc.2017.2846-sm-data.zip [file Readme.pdf › Readme.pdf]

- The do file `intrinsic_analysis_accepted.do` reproduces the results of the paper.
- The data sets `randomization.dta`, `intrinsic_regressions_accepted.dta`, and `byfineminutes.dta` are called by the do file.
- Definitions of variables are provided in the paper.
